# Supplementary material
Source: publisher figshare collection journal article supplement (https://gsapubs.figshare.com/articles/dataset/_/14642592)

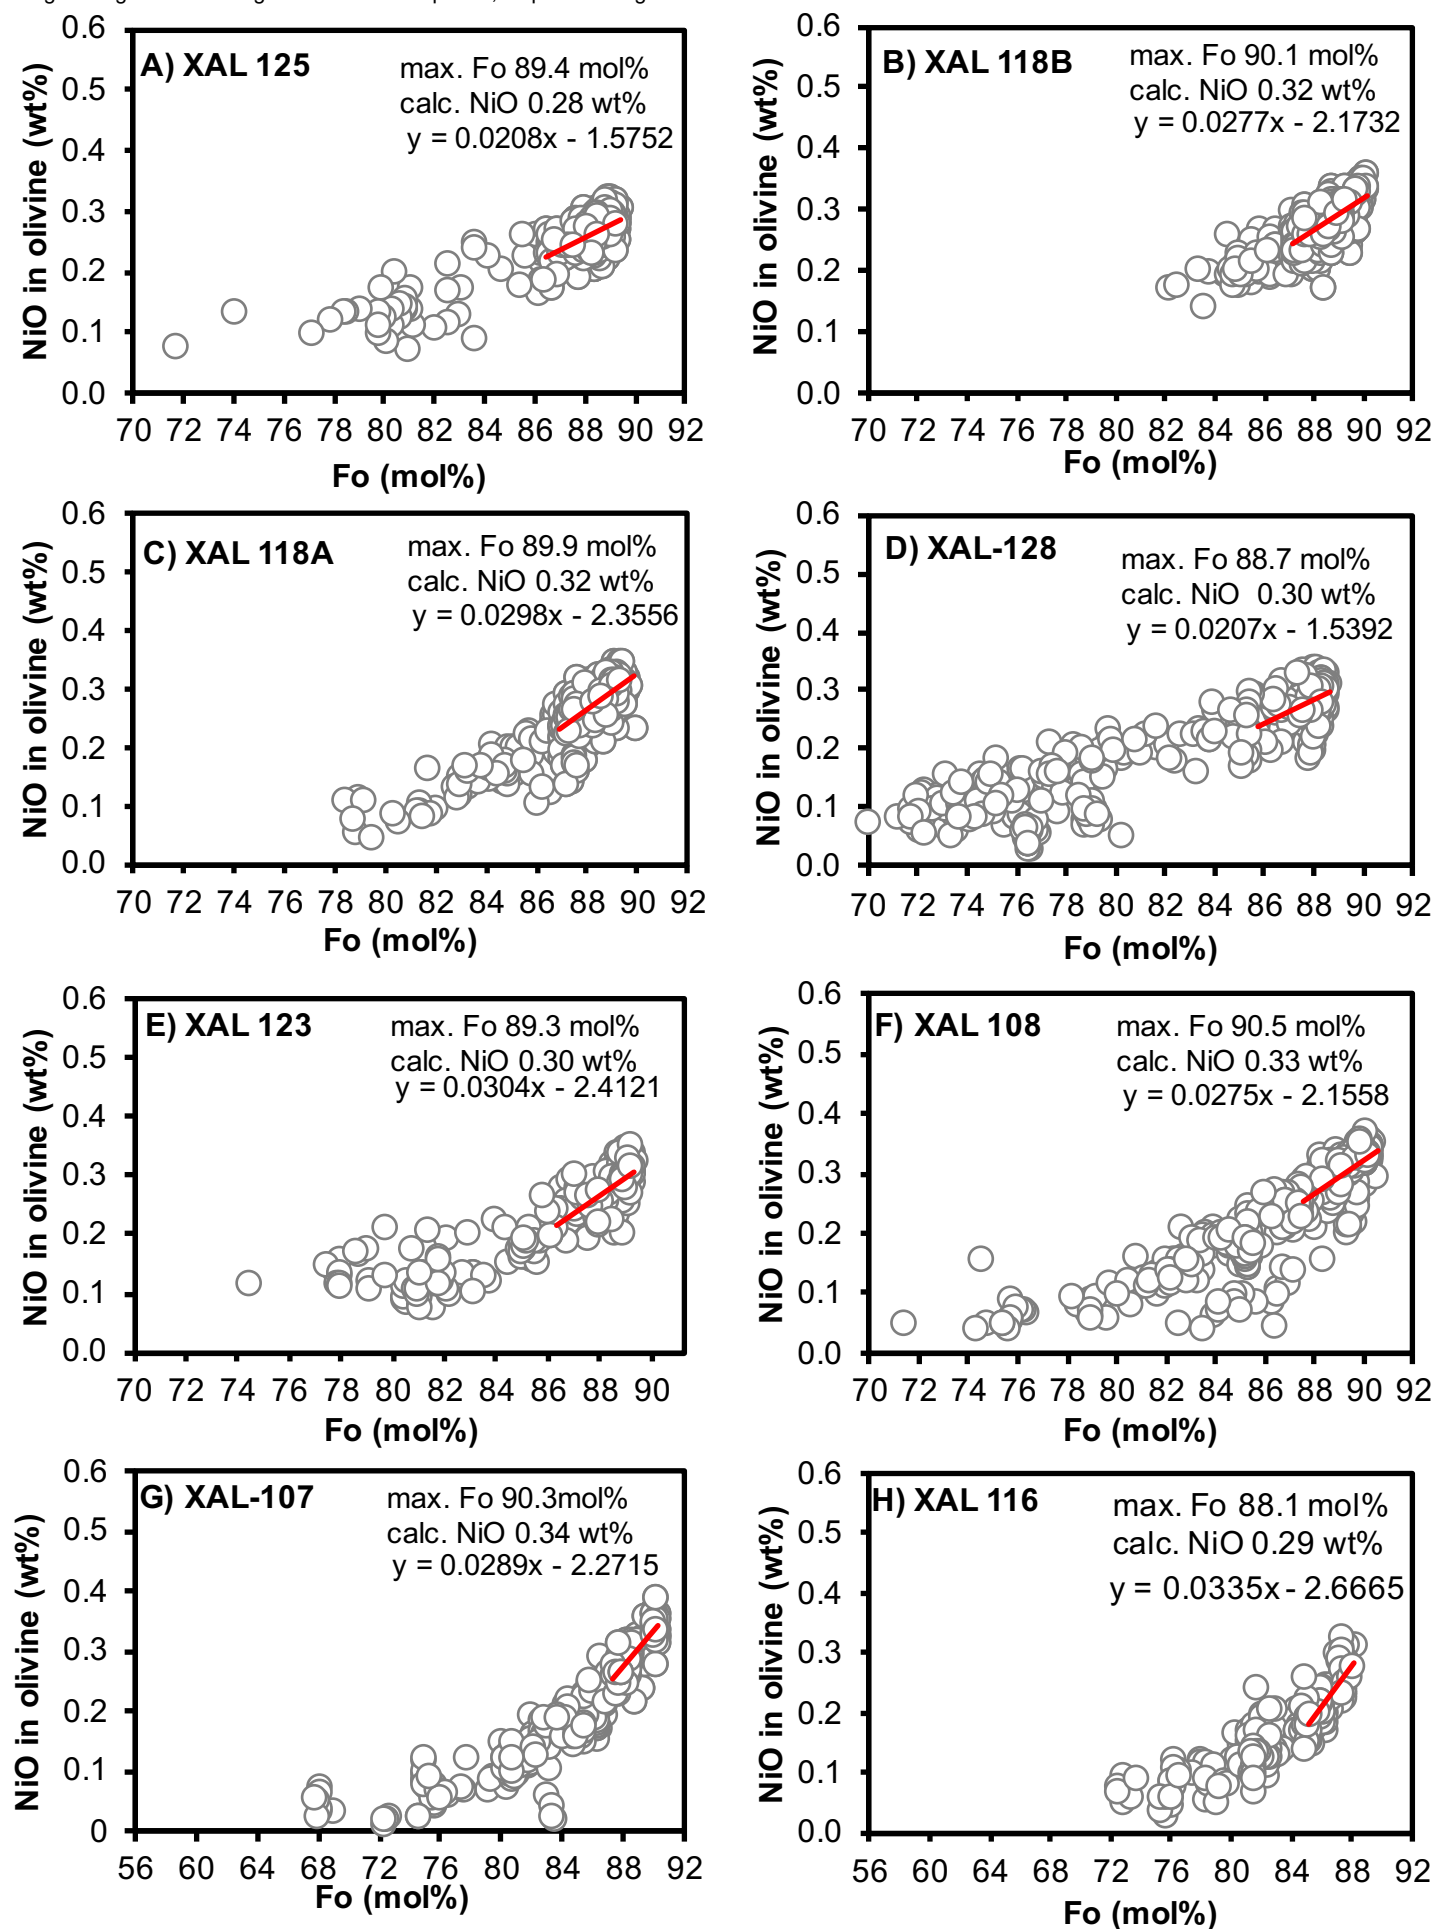

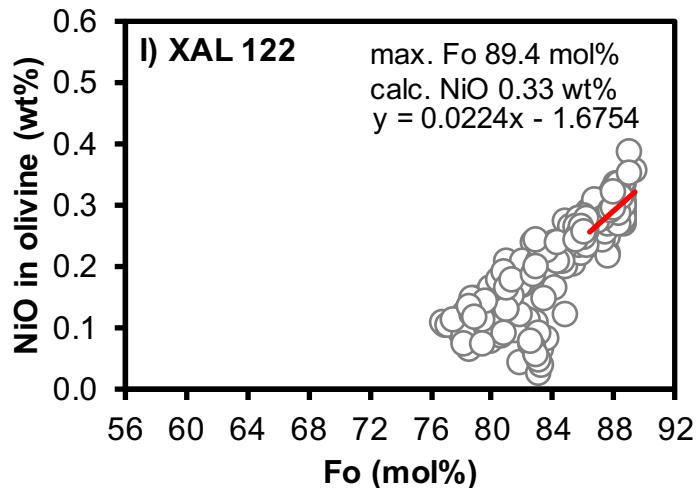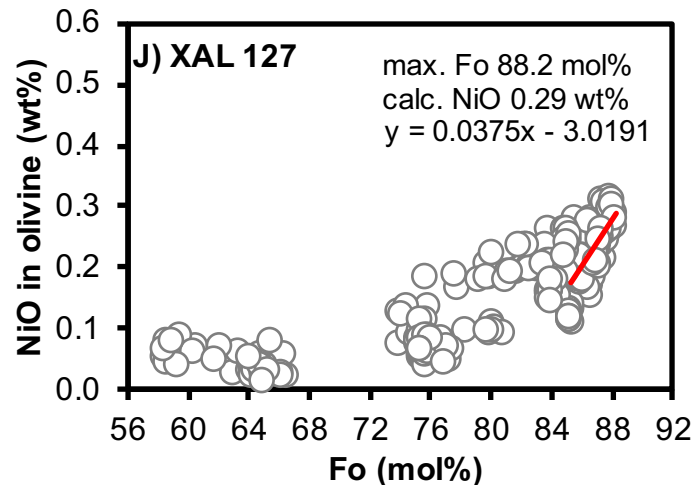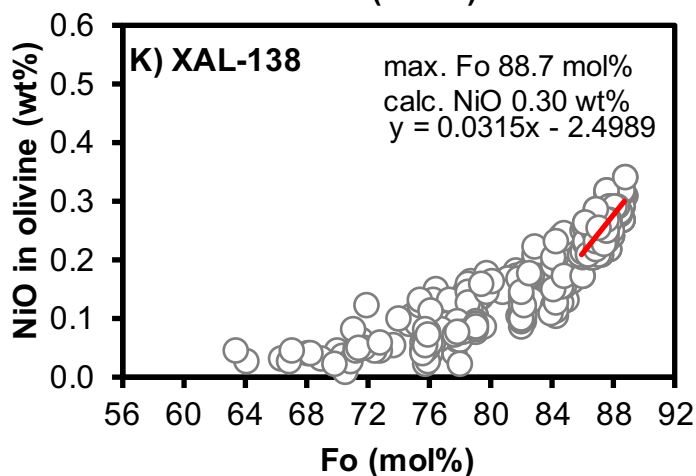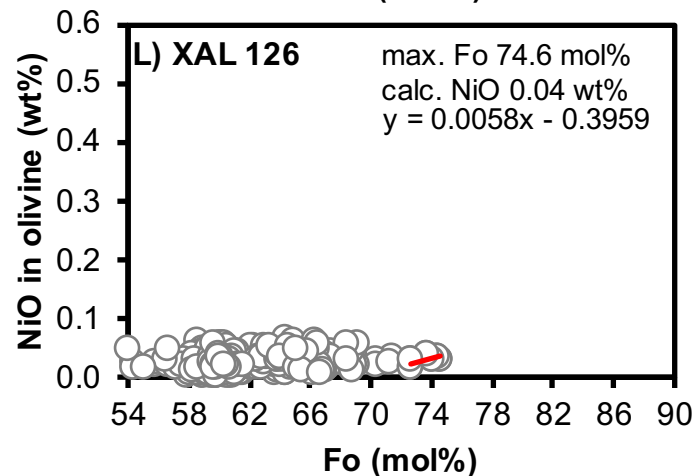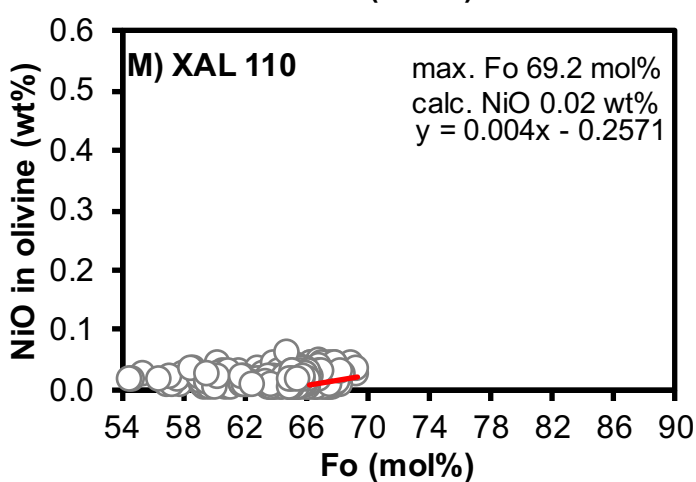

Mesa, J., and Lange, R.A., 2021, Origin of alkali olivine basalts and hawaiites in the western Mexican arc: Evidence of rapid phenocryst growth and magma mixing during ascent along fractures: Geosphere, <https://doi.org/10.1130/GES02365.1>.

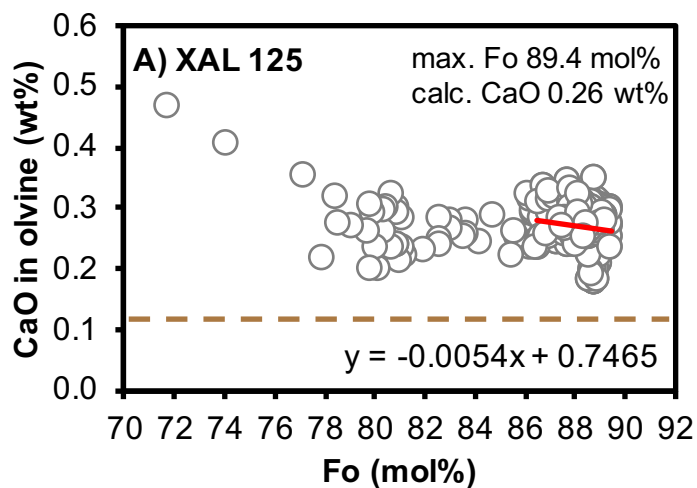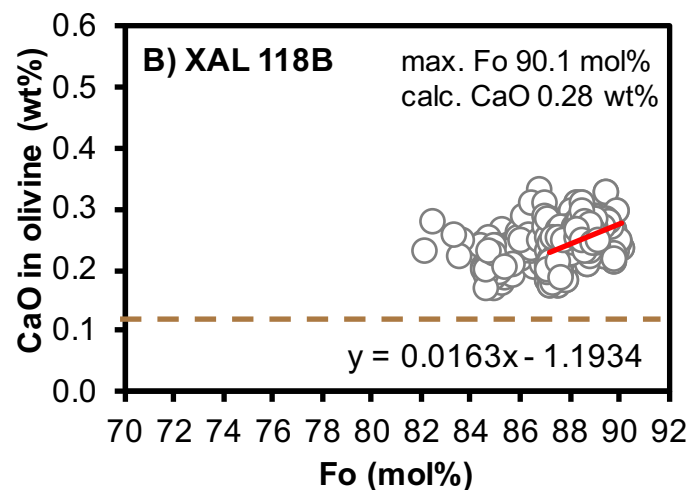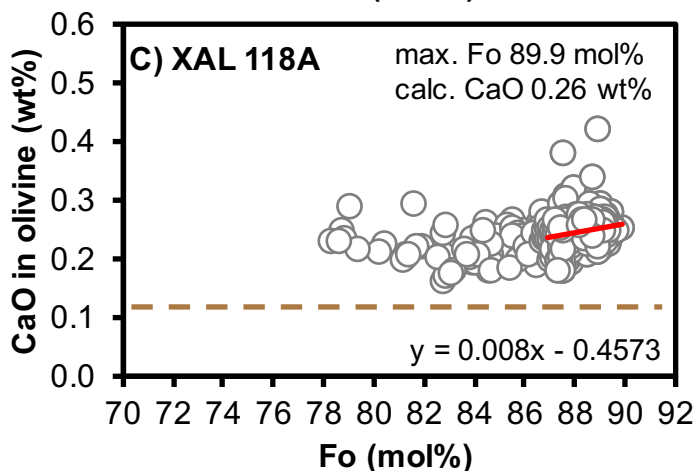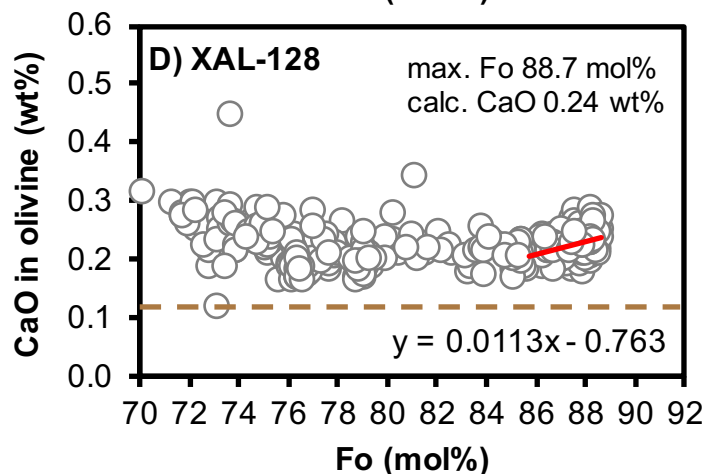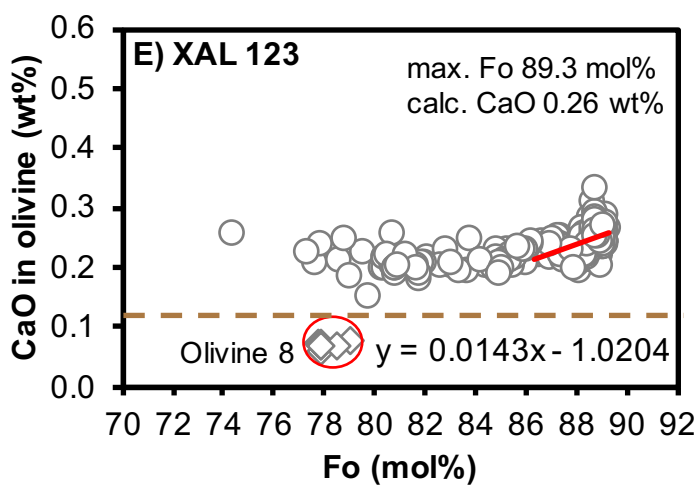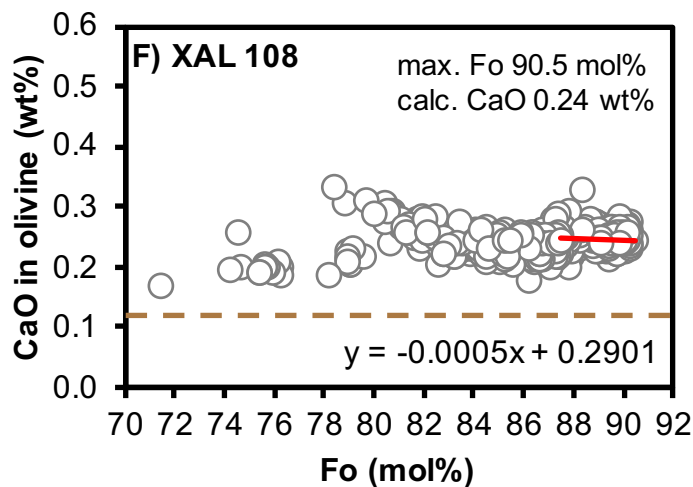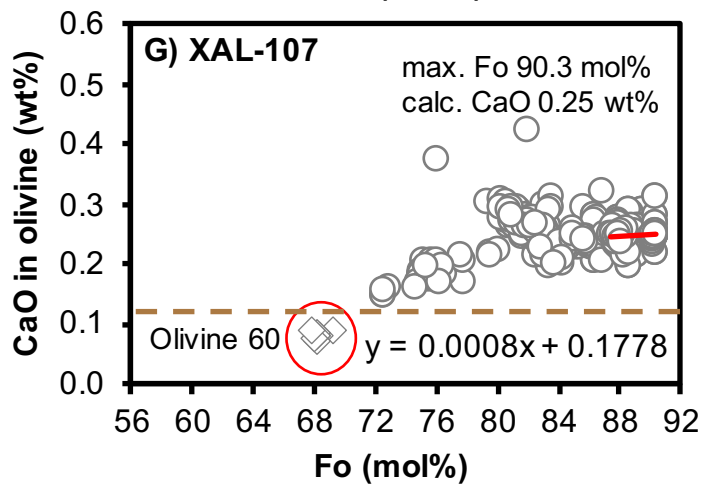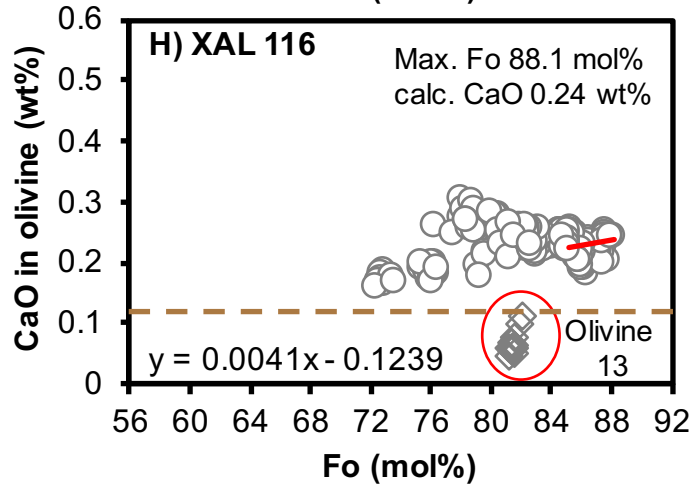

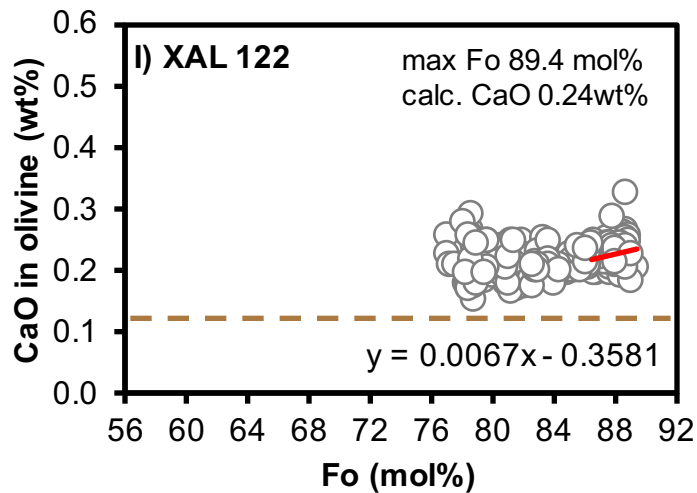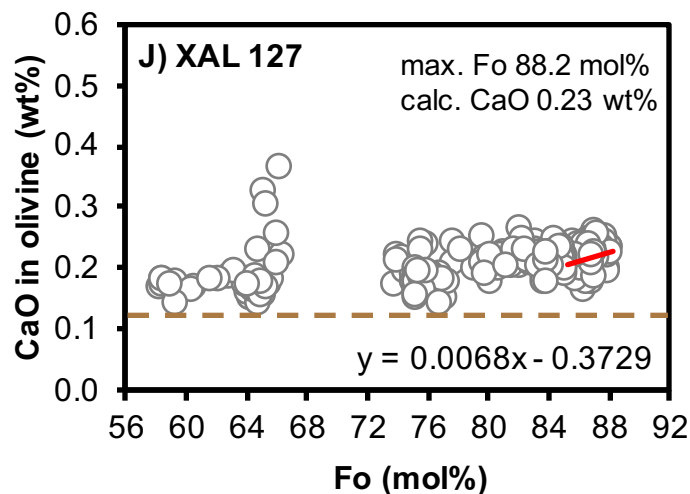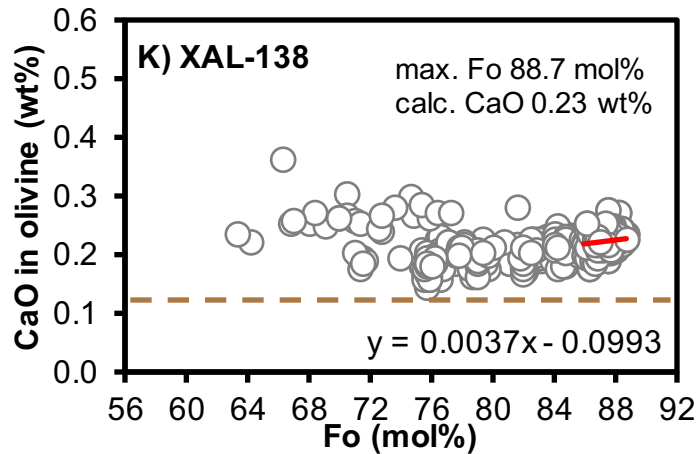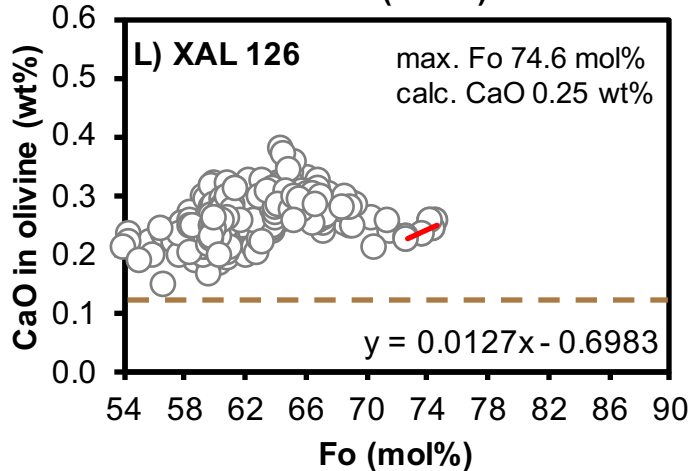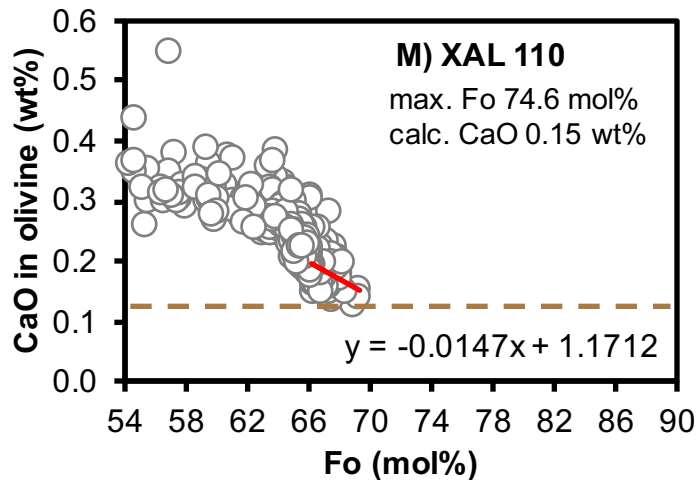

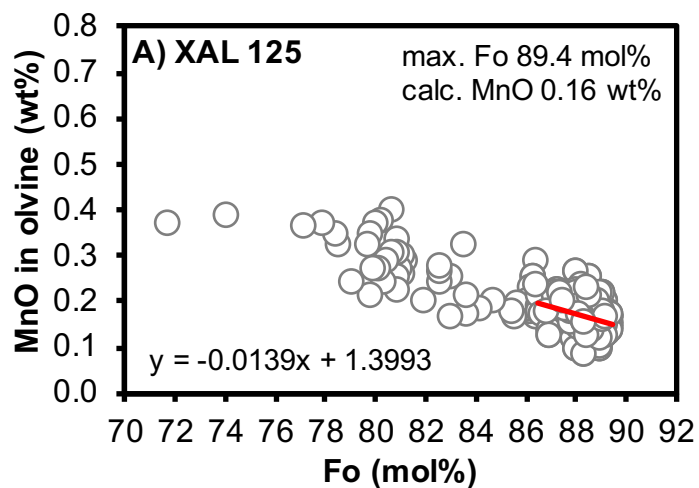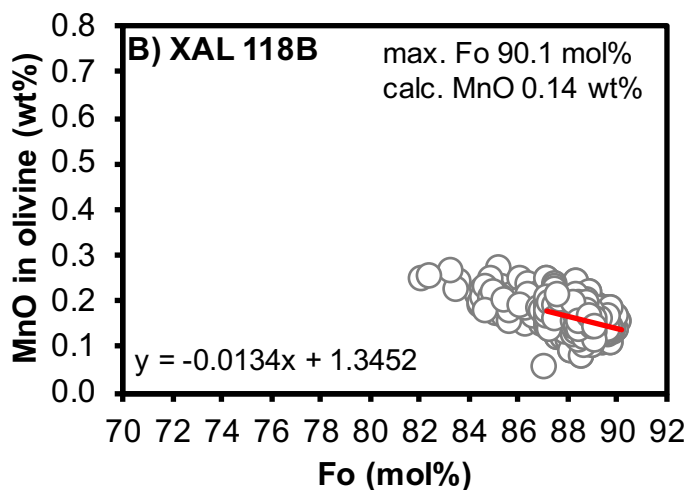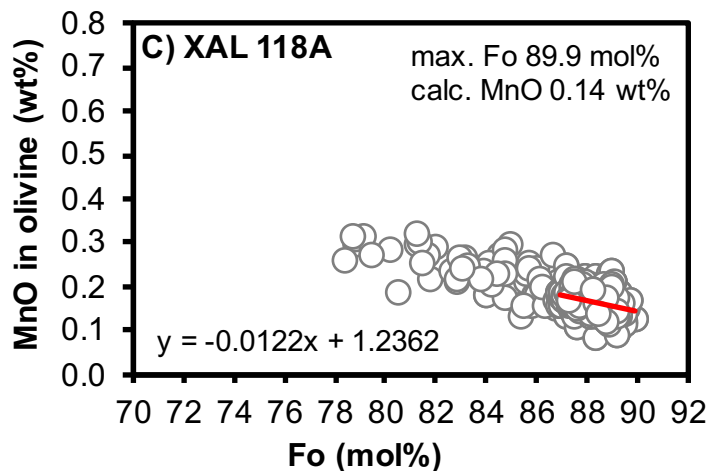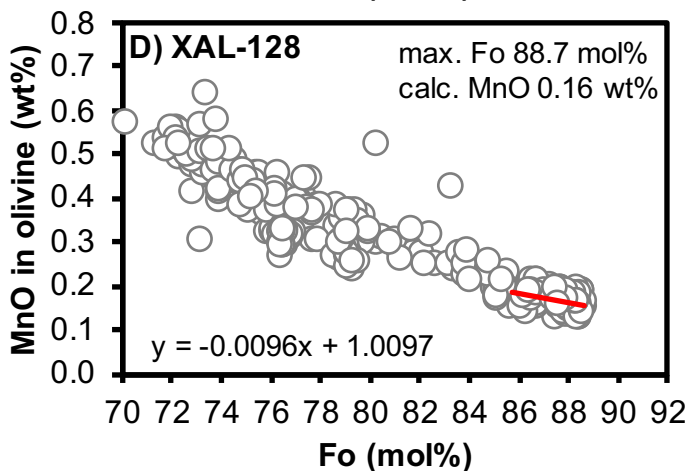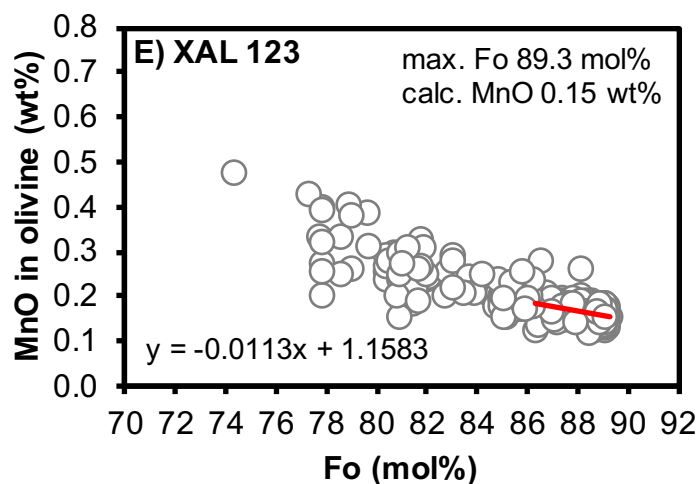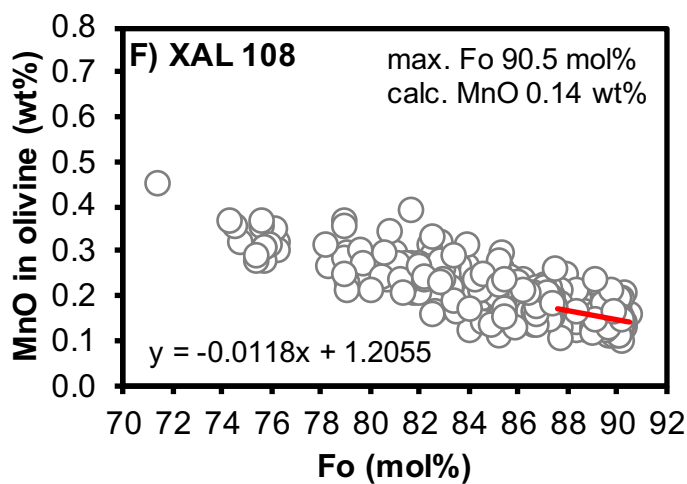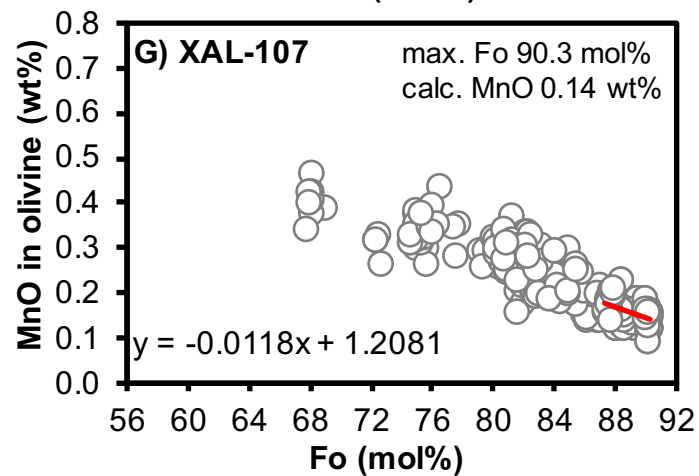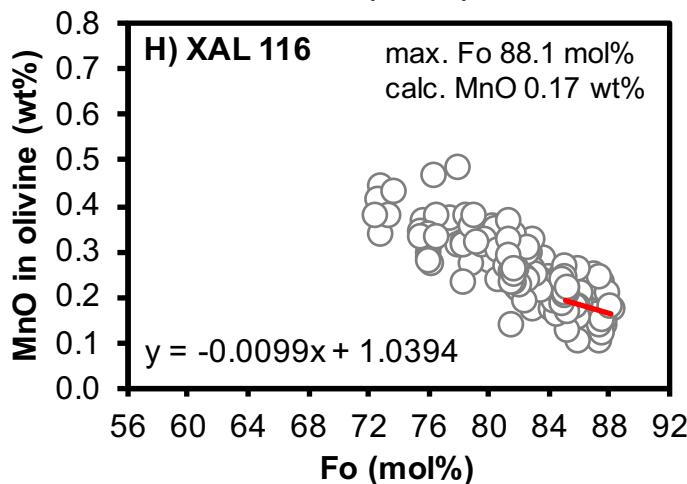

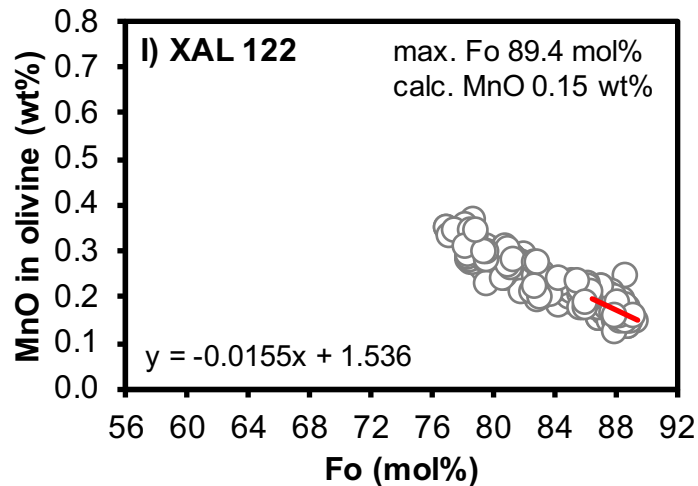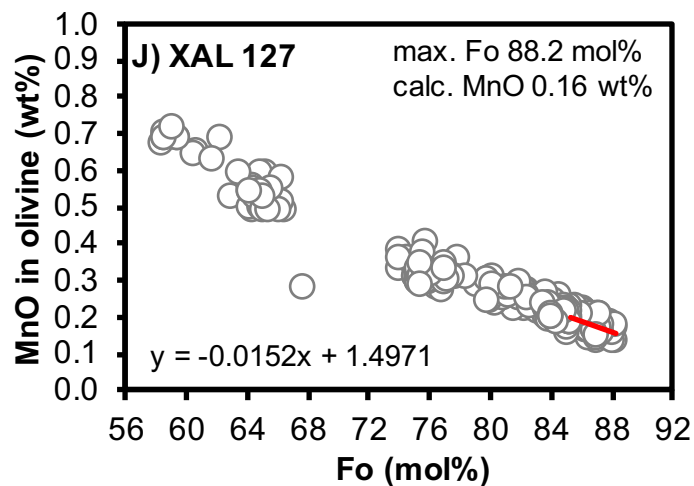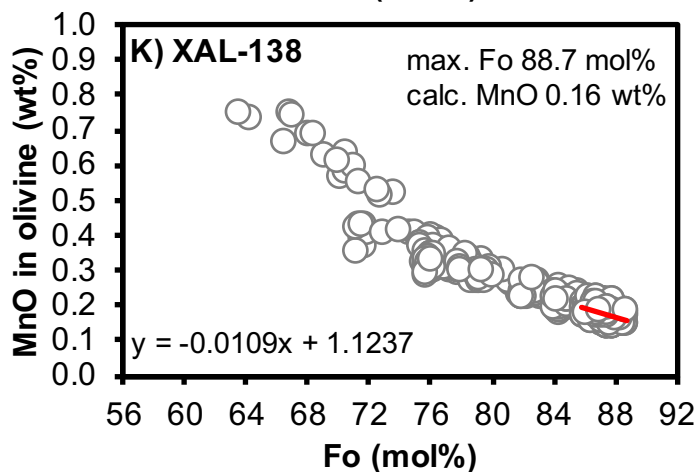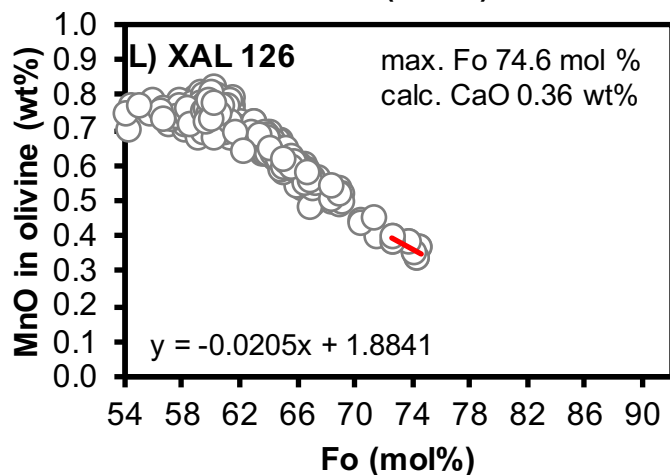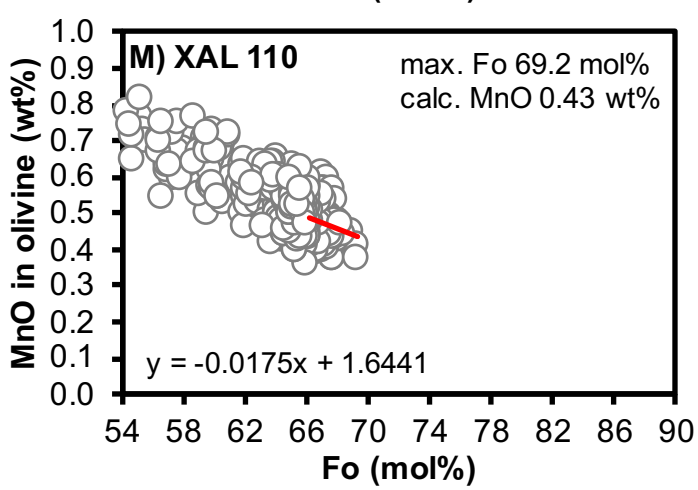

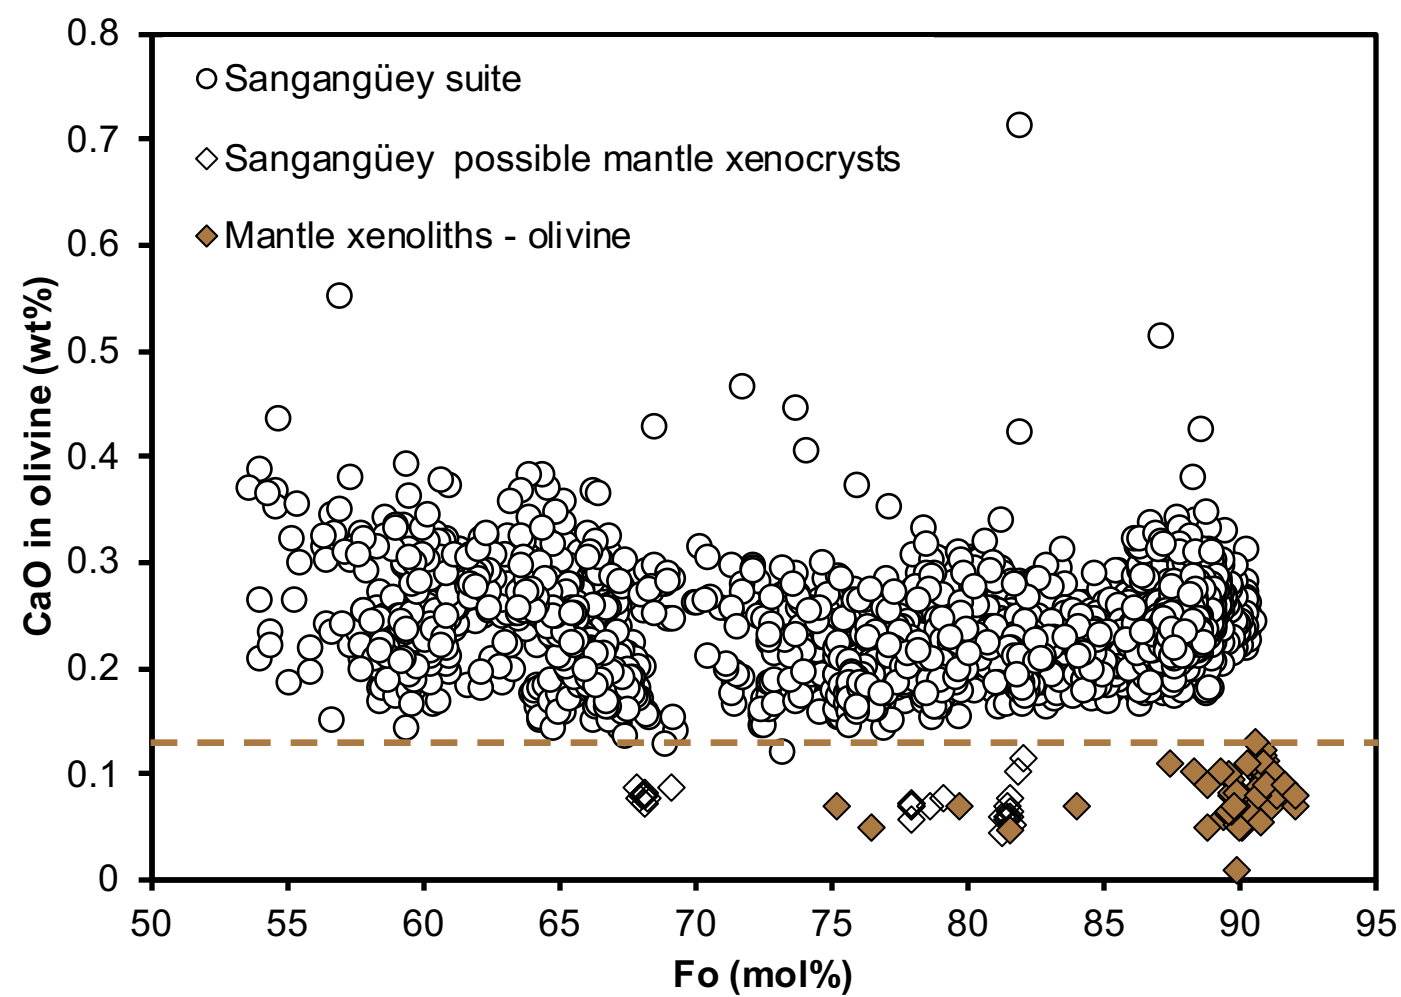

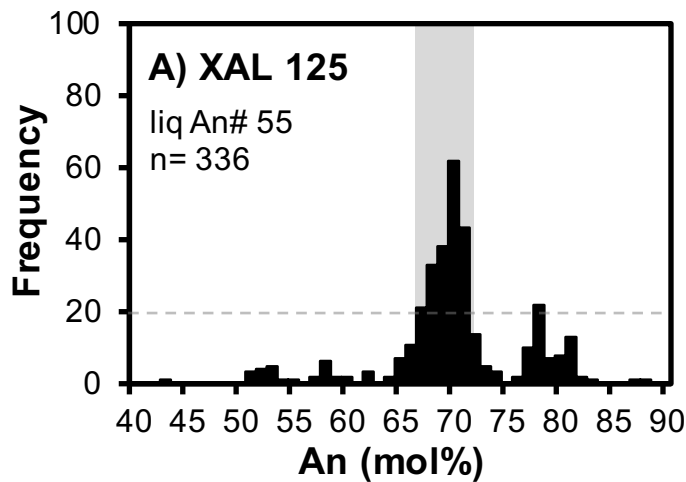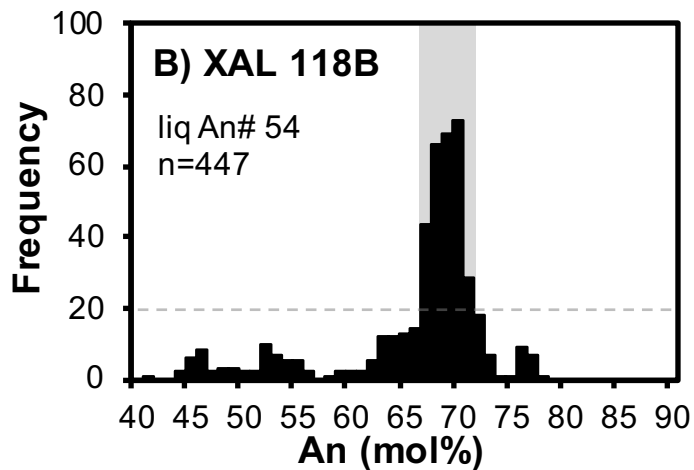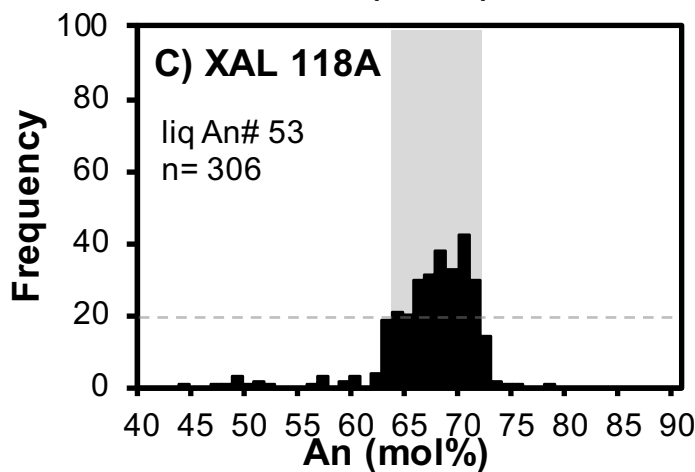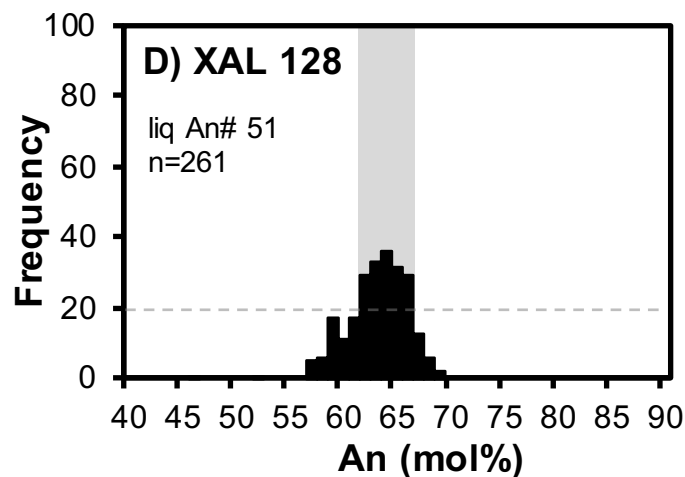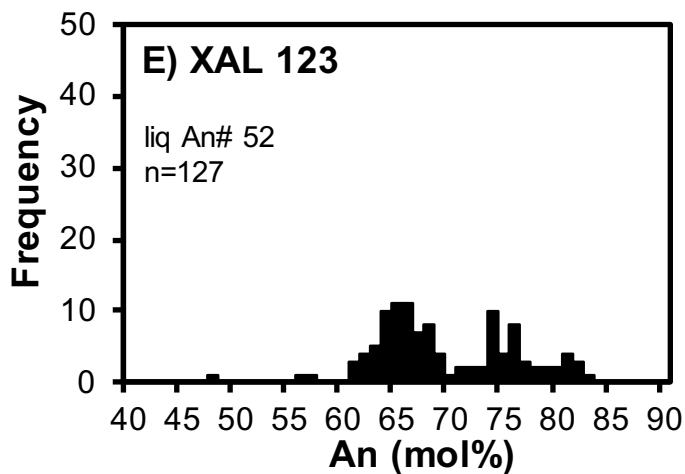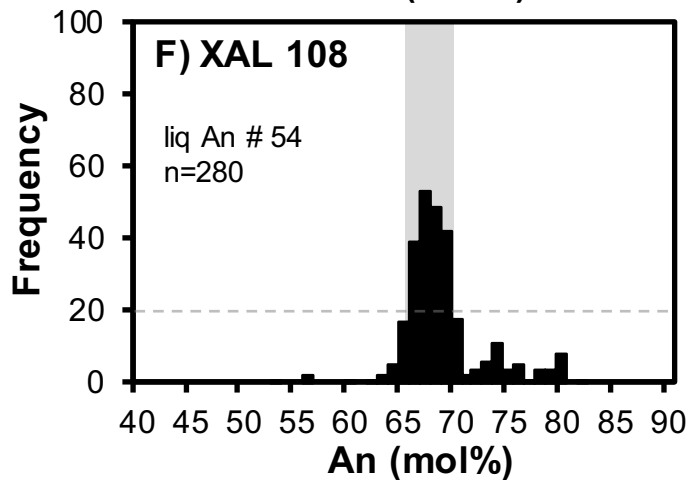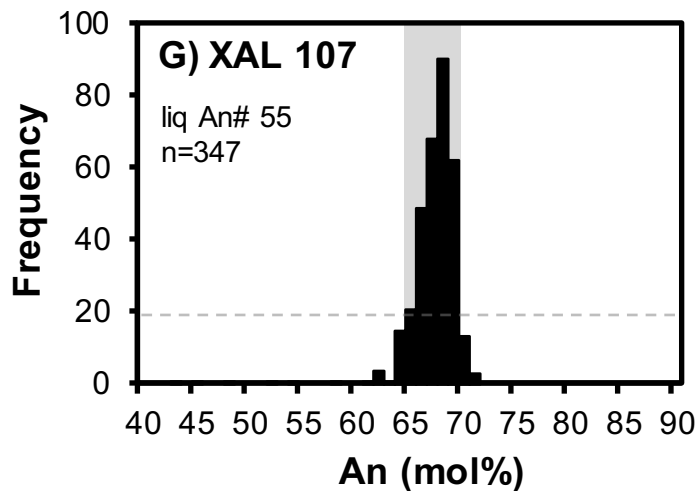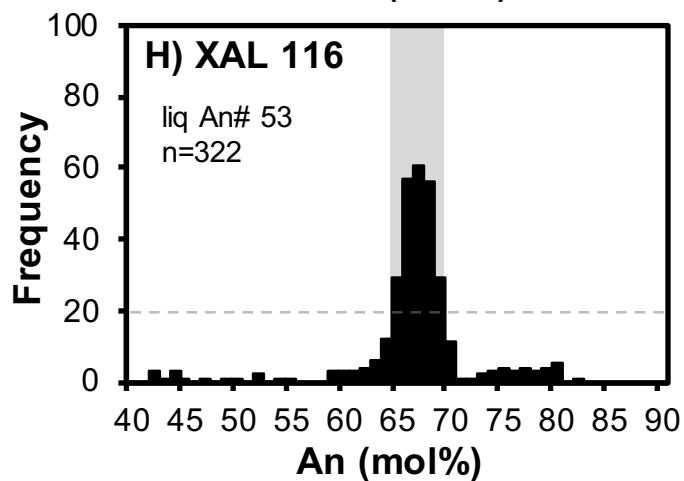



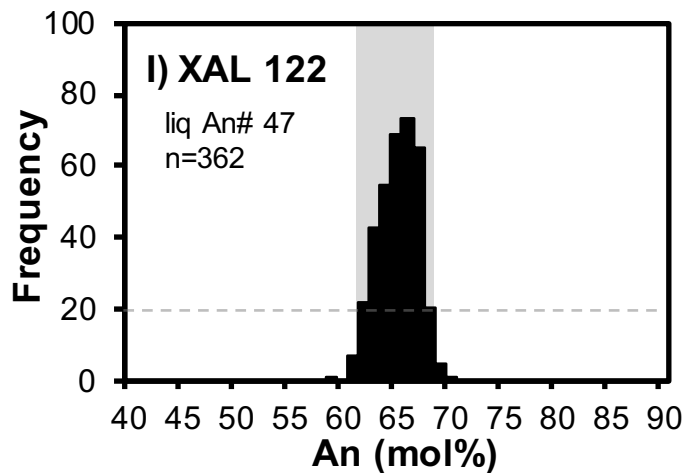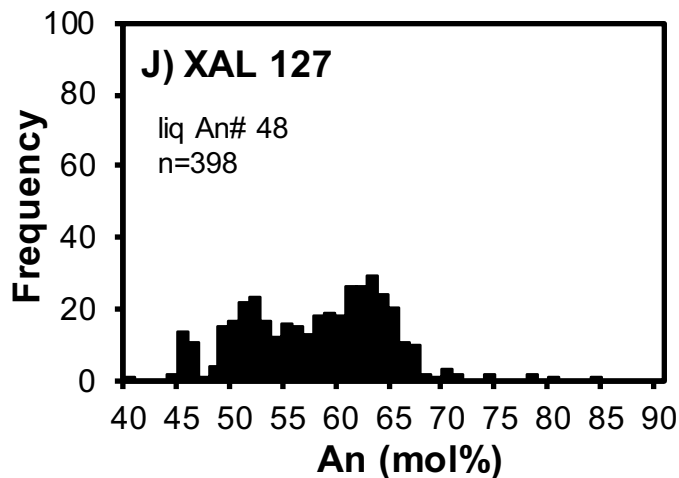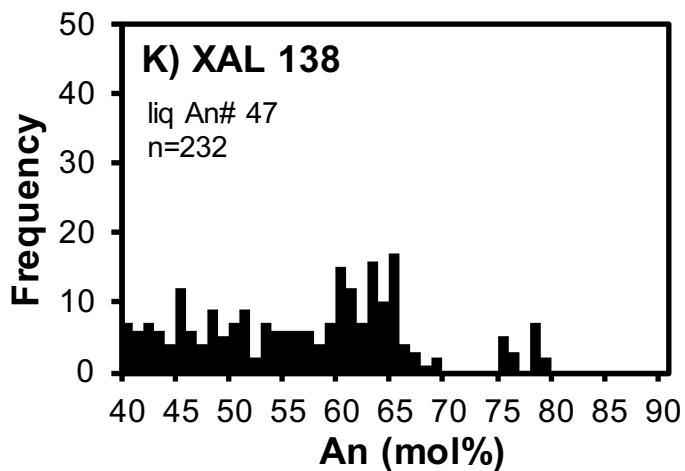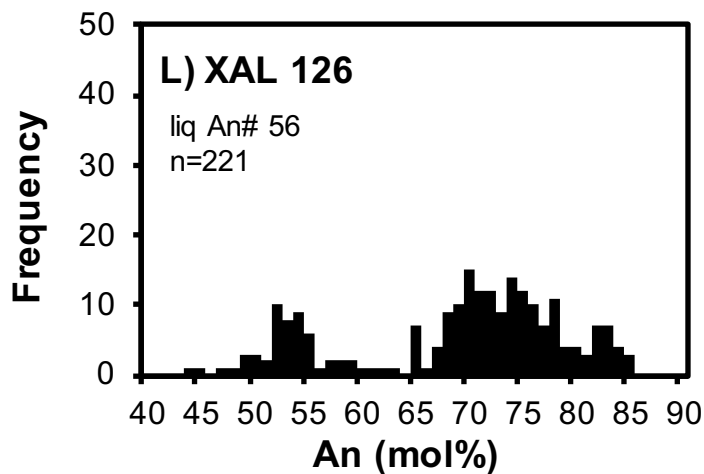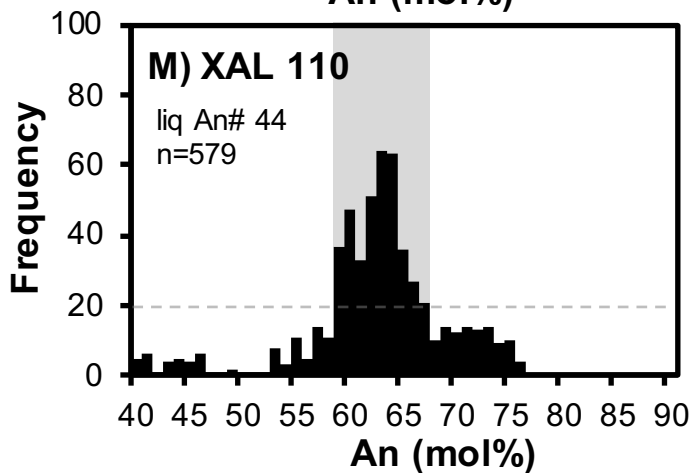

**A) XAL 125**

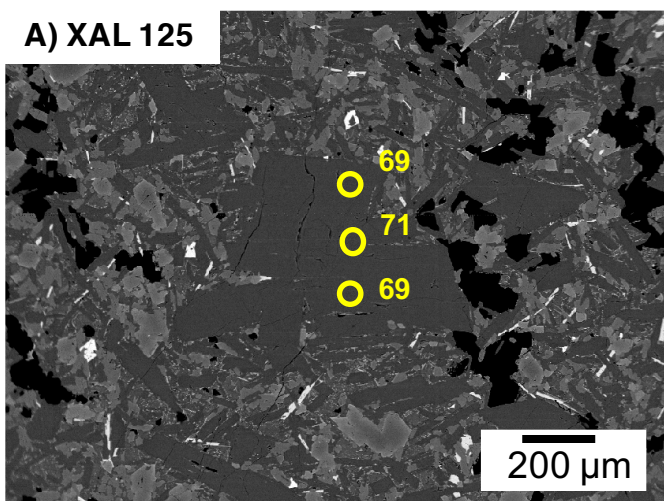

**B) XAL 138**

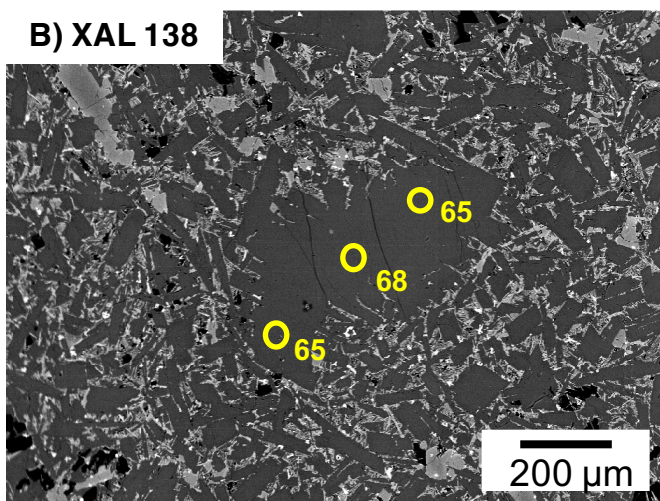

**C) XAL 108**

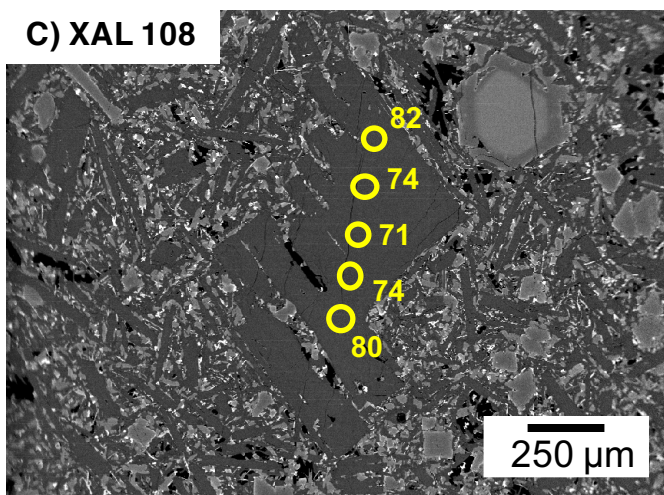

**D) XAL 138**

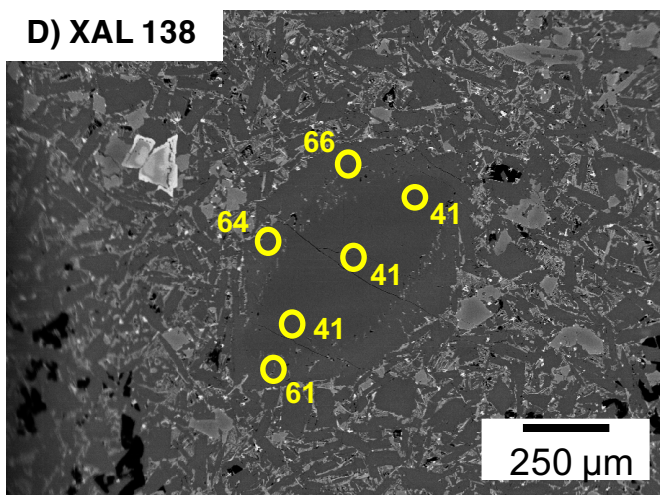

**E) XAL 127**

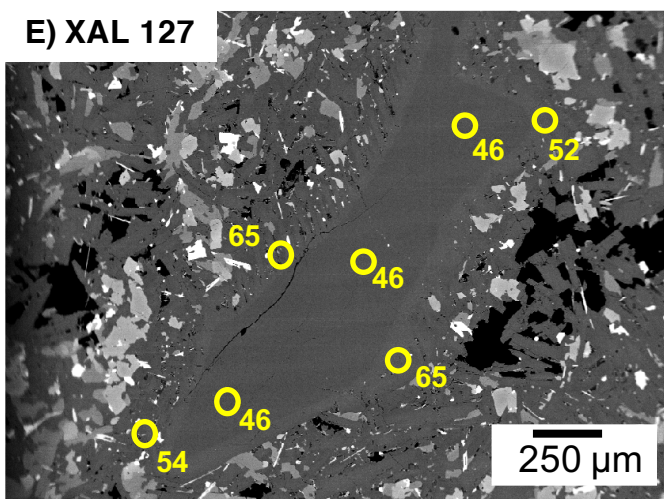

**F) XAL 123**

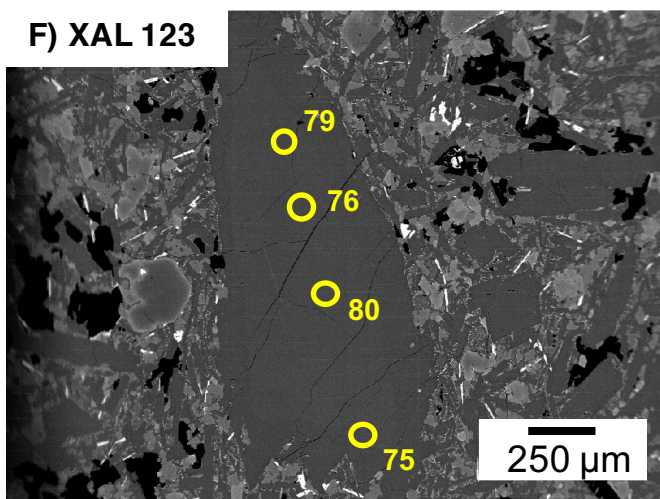

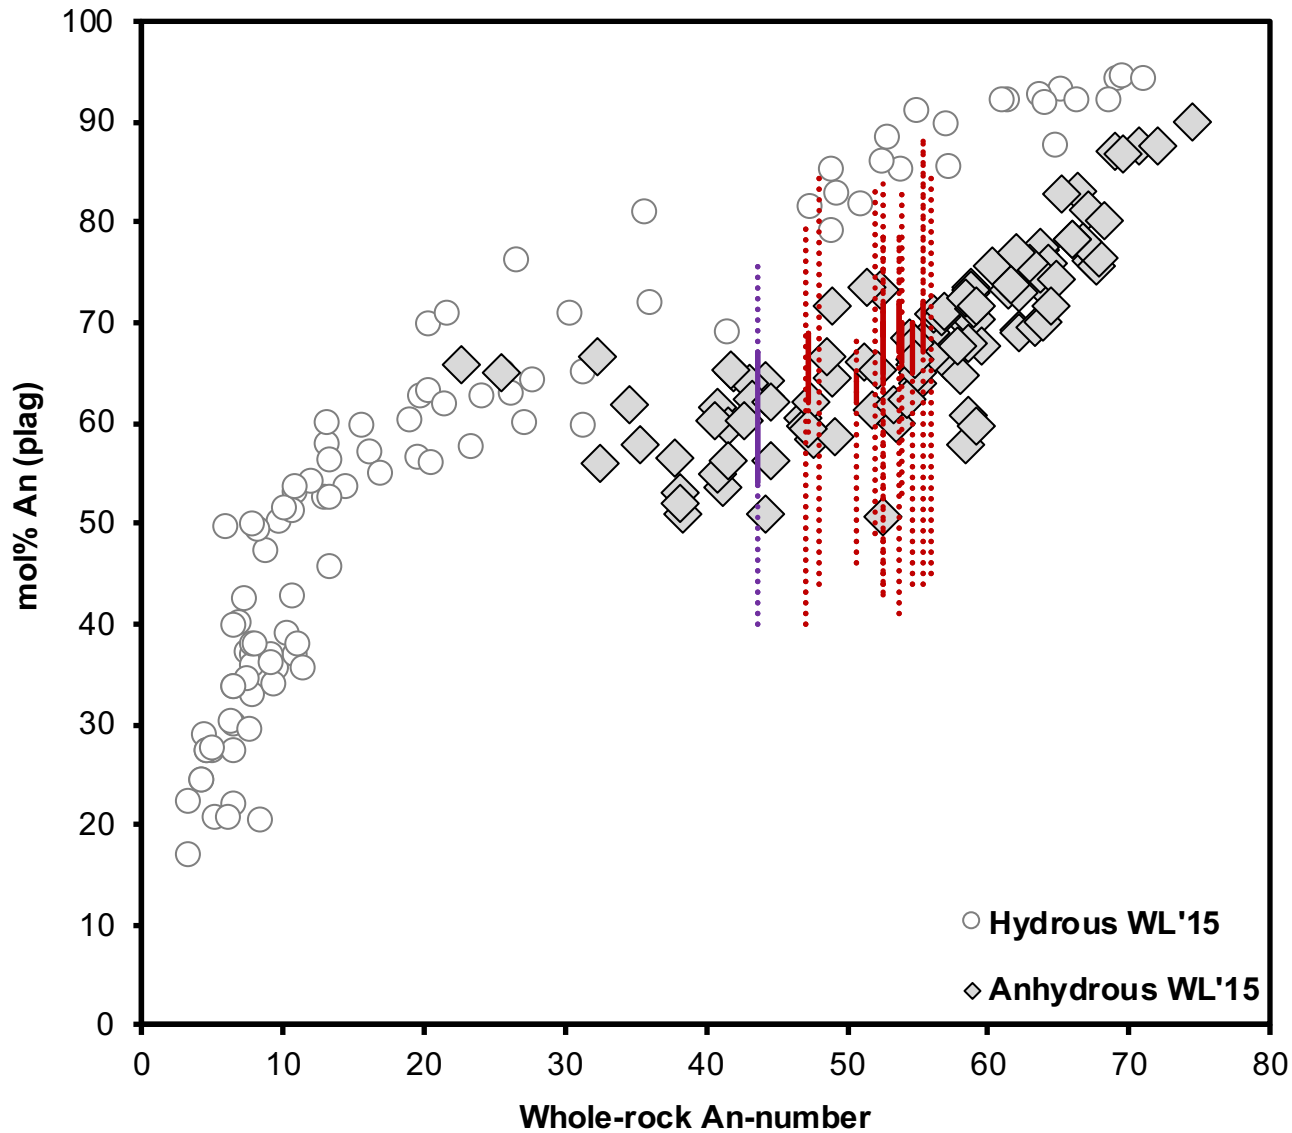

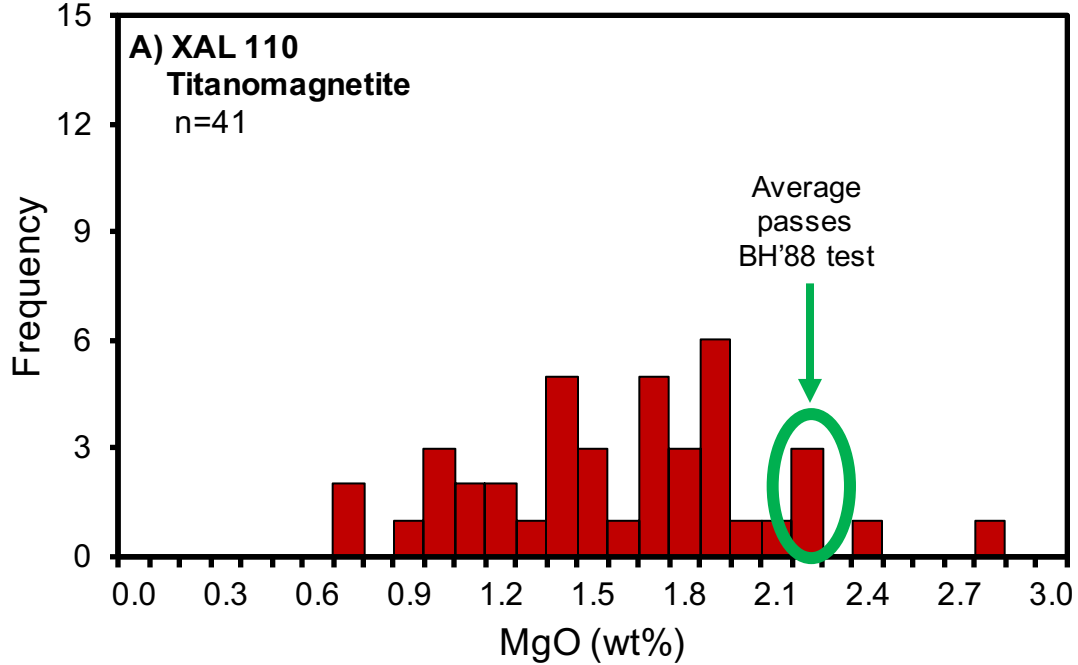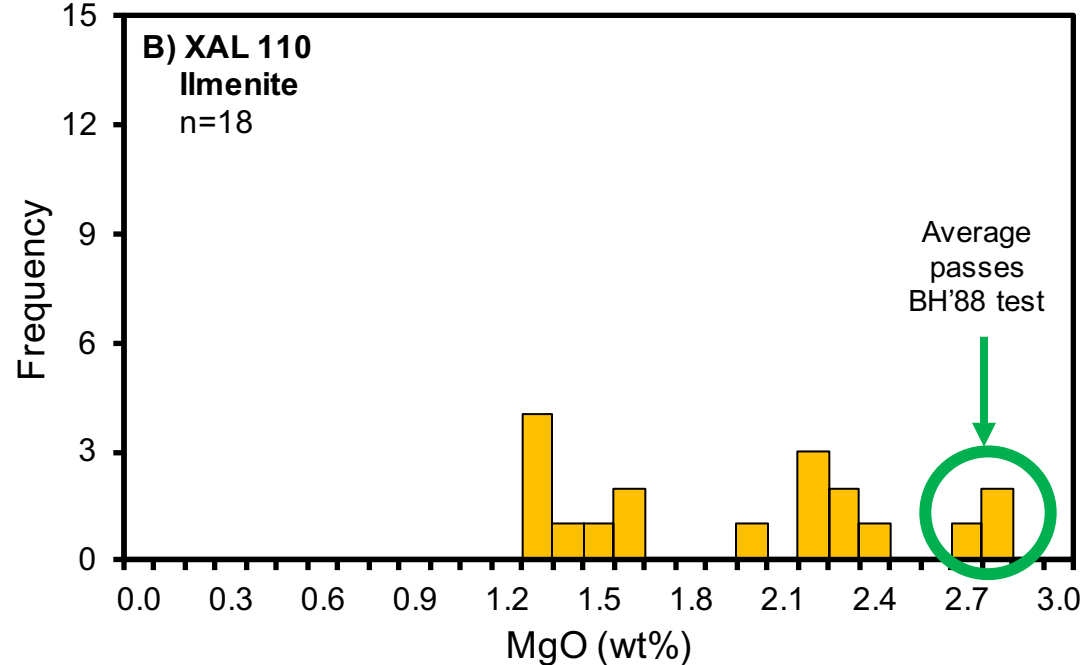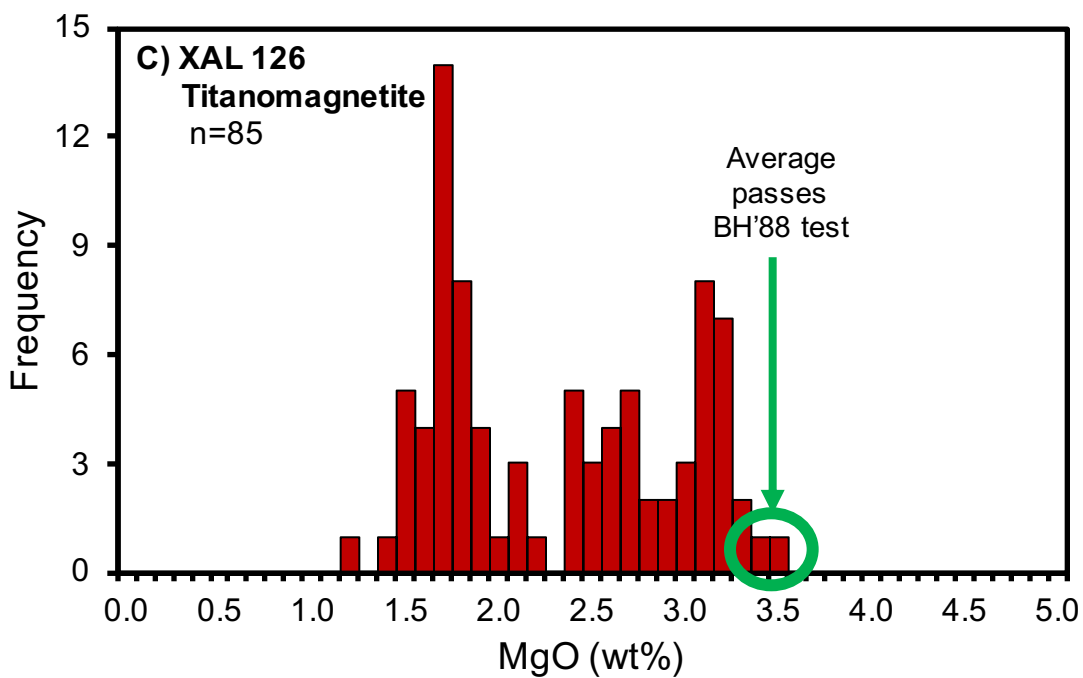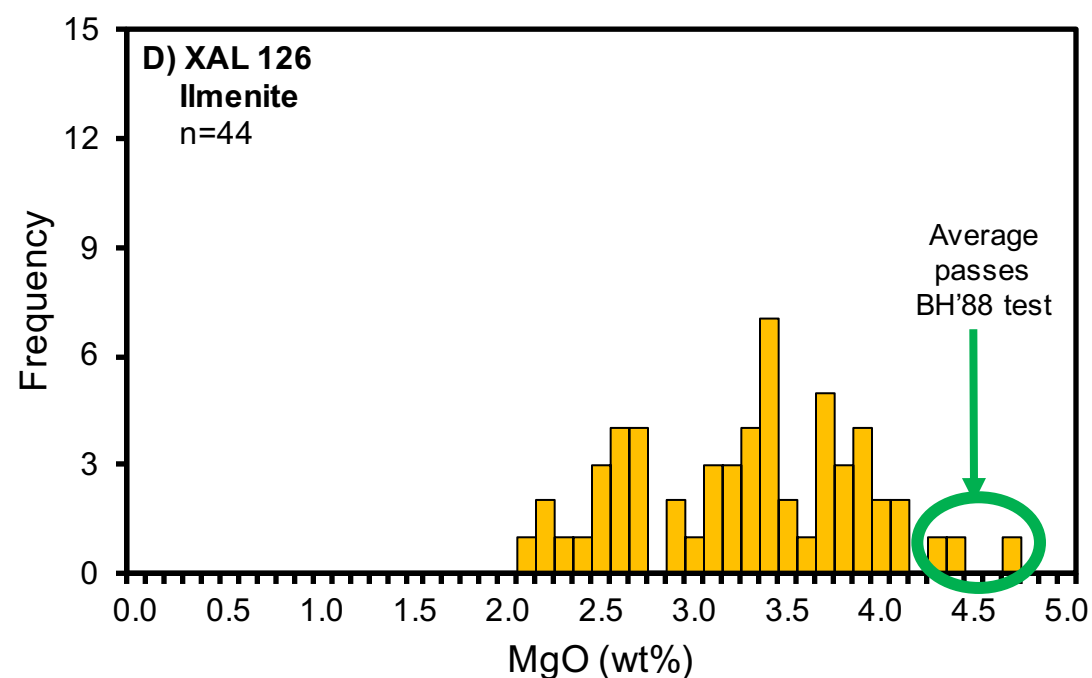

Supplement: Supplementary file 1 [file 2]
